# Supplementary material for: Devastating Decline of Forest Elephants in Central Africa
Source: PLOS journal article supplement (doi:10.1371/journal.pone.0059469), 2013-03-04
Supplement: S2 (10.1371/journal.pone.0059469.s002) [file journal.pone.0059469.s002]

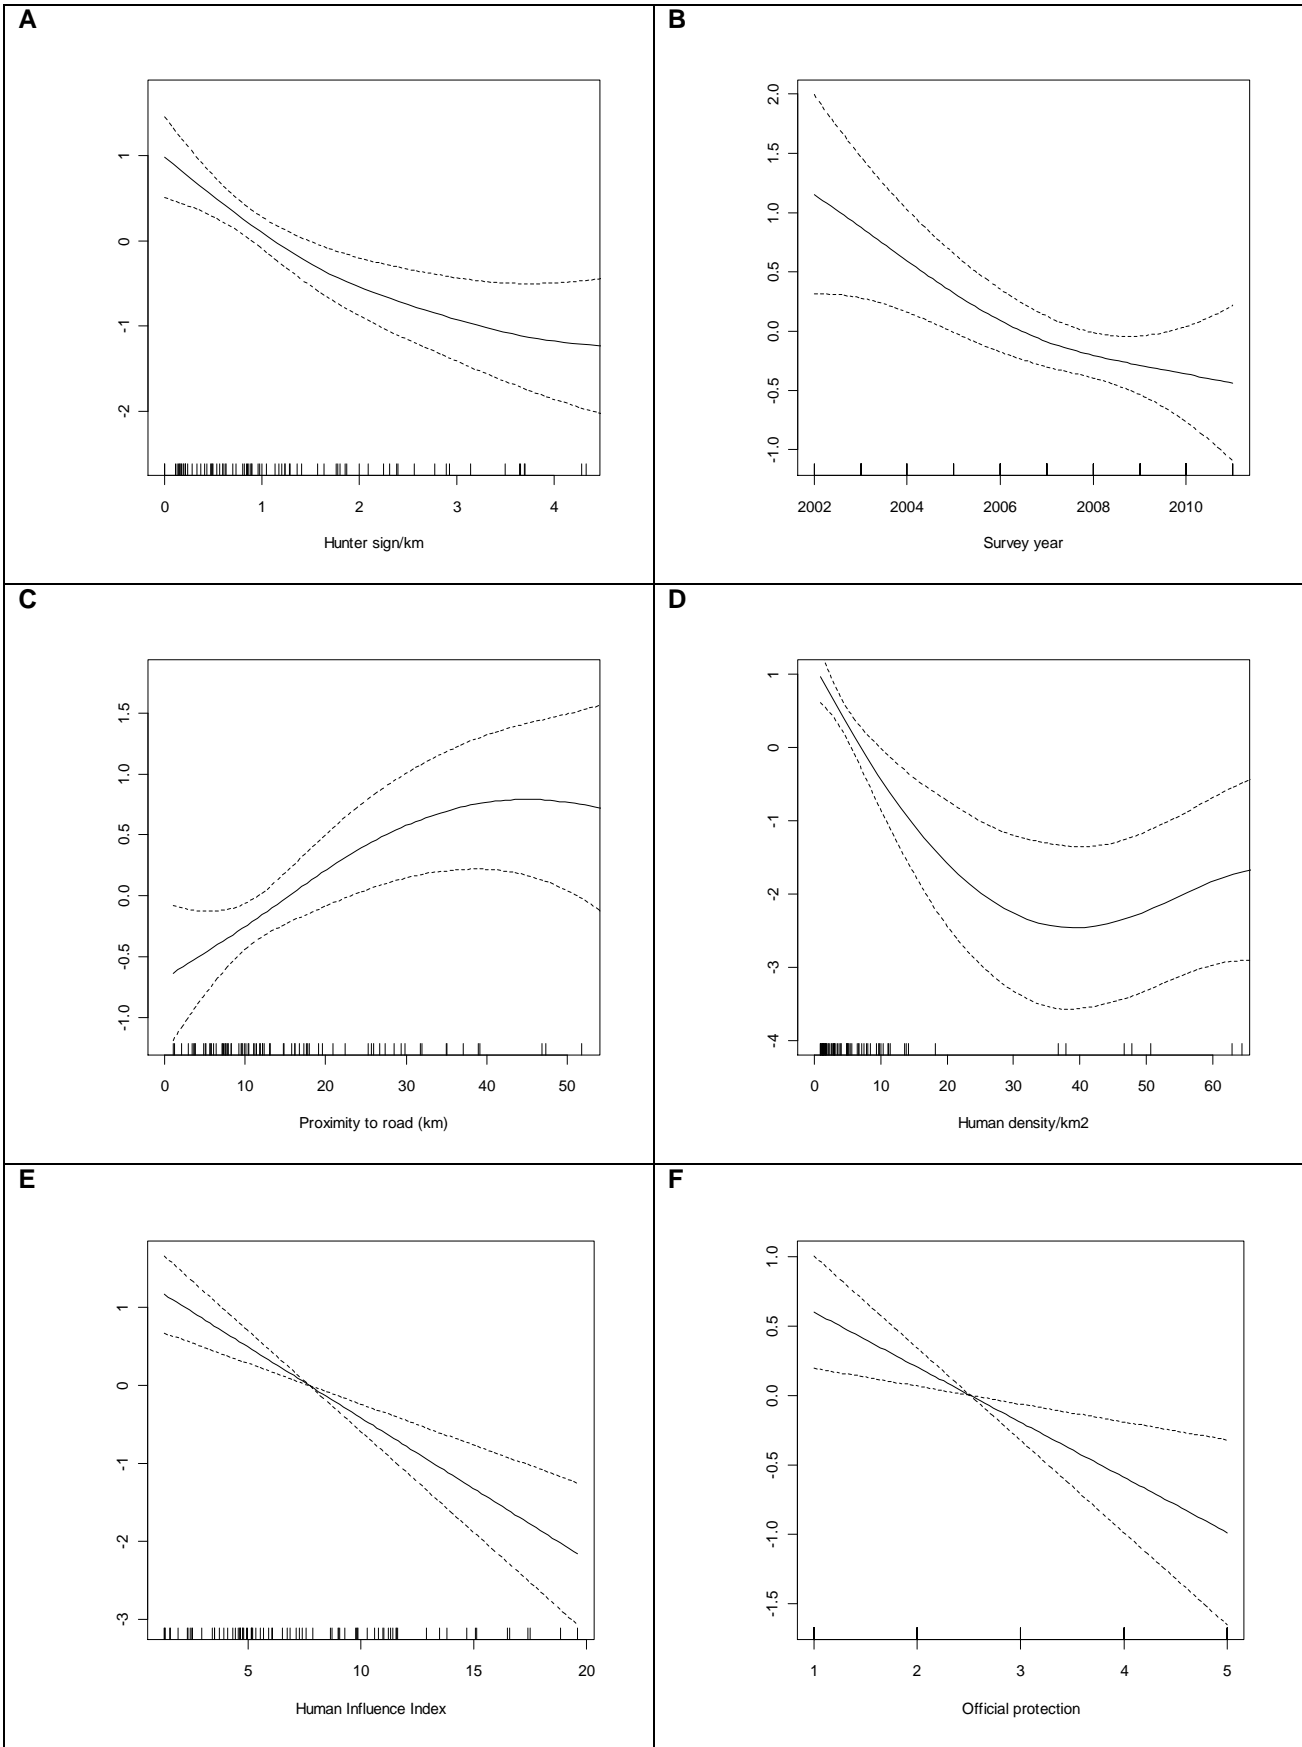

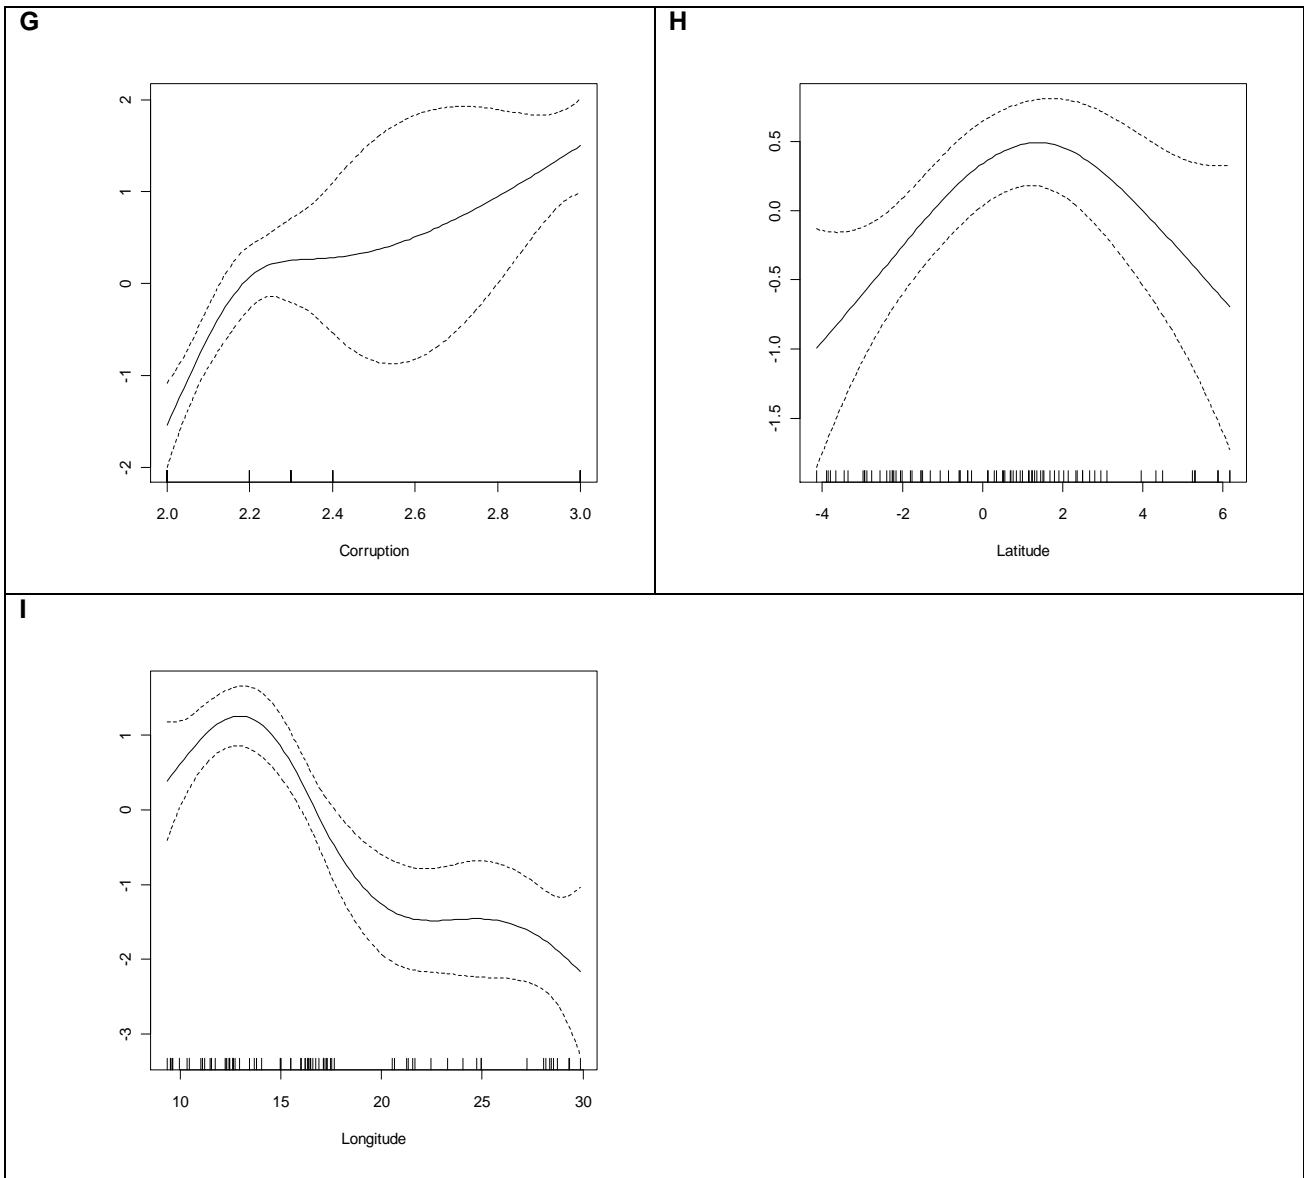

Fig. S2. Estimated conditional dependence of elephant dung density for single variable models.

Results are shown for (A) hunter sign<sup>\*\*\*</sup>, (B) survey year<sup>\*\*</sup>, (C) proximity to roads<sup>\*</sup>, (D) human population density<sup>\*\*\*</sup>, (E) Human Influence Index<sup>\*\*\*</sup>, (F) official protection<sup>\*\*\*</sup> (higher values = less protected), (presence/absence of wildlife guards is a factor covariate and thus not shown here, however, dung density was significantly higher -  $P < 0.001$  - at sites where guards were present), (G) corruption<sup>\*\*\*</sup> (higher values = less corrupt), (H) latitude<sup>\*</sup>, and (I) longitude<sup>\*\*\*</sup>. P-value significance codes are: ‘\*\*\*’  $< 0.001$ , ‘\*\*’  $< 0.01$ , and ‘\*’  $< 0.05$ . Plot components are: Estimates on the scale of the linear predictor (solid lines) with the y-axis scale for each variable selected to optimally display the results, confidence intervals (dashed lines), explanatory variable values of observations with a focus on the core 95% of values for a, c and d (rug plot - short vertical bars along each x-axis).
