# Supplementary material for: Devastating Decline of Forest Elephants in Central Africa
Source: PLOS journal article supplement (doi:10.1371/journal.pone.0059469), 2013-03-04
Supplement: S4 (10.1371/journal.pone.0059469.s004) [file journal.pone.0059469.s004]

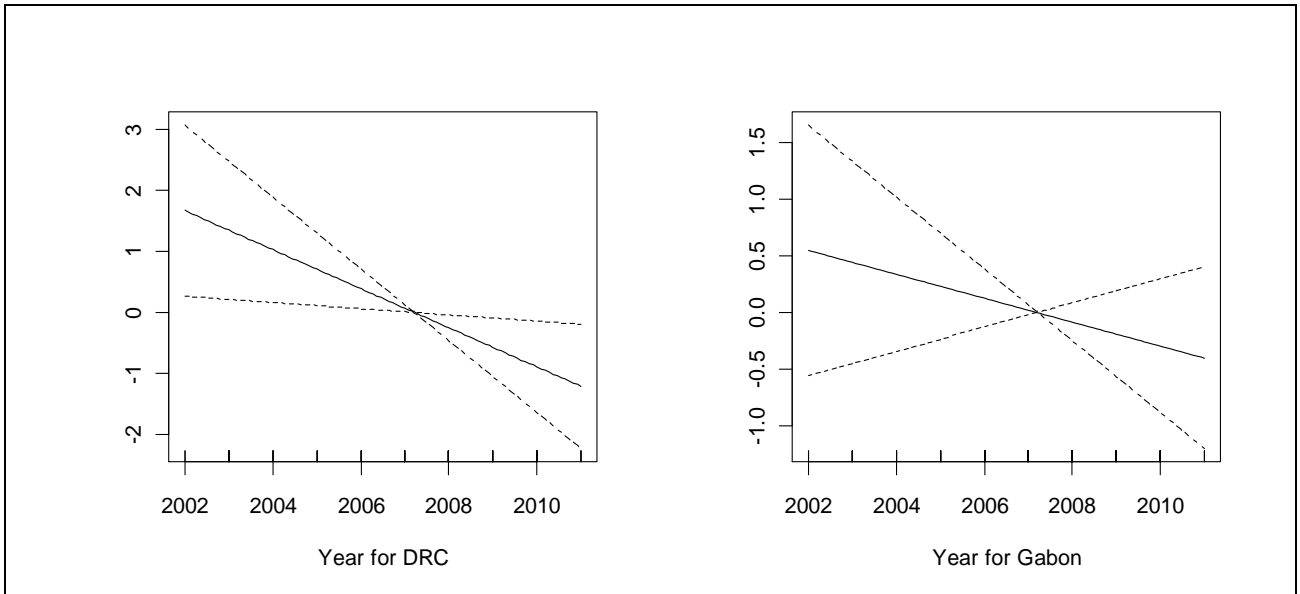

Fig. S4. Estimated conditional dependence of elephant dung density considering survey year by country for a multi-variable models including hunter sign.

Survey year by country focusing on the Democratic Republic of Congo (DRC) and Gabon for the model with variables hunter sign\*, survey year by country\*, proximity to roads, human population density\*\*\*, corruption\*\*\* and presence/absence of guards\*\*\* (dung density was significantly more -  $P < 0.001$  - at sites where guards were present). P-value significance codes are: '\*\*\*' $<0.001$ , '\*\*' $<0.01$ , '\*' $<0.05$ , and '^' $<0.1$ . Plot components are: Estimates on the scale of the linear predictor (solid lines) with the y-axis scale for each variable selected to optimally display the results, confidence intervals (dashed lines), and explanatory variable values of observations (rug plot - short vertical bars along each x-axis).
