# Supplementary material for: Devastating Decline of Forest Elephants in Central Africa
Source: PLOS journal article supplement (doi:10.1371/journal.pone.0059469), 2013-03-04
Supplement: S6 (10.1371/journal.pone.0059469.s006) [file journal.pone.0059469.s006]

Table S2. Analysis results for top-ranking predictive models (excluding hunter sign as an explanatory variable), which included (a) the Human Influence Index (HII), or (b) human population density and proximity to road (SPD). Details of the variables included in each model are given along with the percent deviance explained and UBRE score value. Estimated average elephant dung density (/km<sup>2</sup>) from model predictions across the Central African forests and bootstrapped 95% confidence intervals are shown. If the model included the survey year variable then prediction is for the endpoints of the time series (2002 and 2011); otherwise the prediction can be interpreted as an average over the 2002-2011 time period. Also shown for the models that permit temporal prediction is the overall percent decline and overall percent range loss for the period 2002-2011 (elephants are assumed to be absent when dung density falls below 100 elephant dung piles/km<sup>2</sup>; see Table S3 and Fig. 2 for details, including a breakdown by country).

| Model Group    | Model No. | Model Variables                                         | Deviance explained                 | UBRE score | Prediction Period | Average Dung Density | 95% CI            | % Decline         | % Range Loss |       |
|----------------|-----------|---------------------------------------------------------|------------------------------------|------------|-------------------|----------------------|-------------------|-------------------|--------------|-------|
| <b>a</b>       | HII 1     | HumanInfluence.Corruption.Guards.Lon                    | 41.4%                              | 1.8450     | 2002-2011         | 175.56               | (118.63 - 280.85) | -                 |              |       |
|                | HII 2     | Year.HumanInfluence.Corruption.Guards.Lat.Lon           | 46.1%                              | 1.8479     | 2002              | 271.80               | (115.29 - 751.07) | 55.30             | 17.68        |       |
|                |           |                                                         |                                    |            | 2011              | 121.49               | (64.08 - 345.16)  |                   |              |       |
|                | HII 3     | HumanInfluence.Corruption.Guards                        | 40.8%                              | 1.8614     | 2002-2011         | 178.18               | (116.01 - 241.30) | -                 |              |       |
|                | HII 4     | Year.HumanInfluence.Corruption.Guards.Lon               | 43.1%                              | 1.9099     | 2002              | 327.06               | (146.50 - 776.32) | 69.12             | 29.84        |       |
|                |           |                                                         |                                    |            | 2011              | 101.00               | (53.60 - 253.45)  |                   |              |       |
|                | HII 5     | Year.HumanInfluence.Corruption.Guards                   | 41.1%                              | 1.9279     | 2002              | 347.78               | (116.25 - 648.40) | 69.04             | 31.33        |       |
|                |           |                                                         |                                    |            | 2011              | 107.67               | (53.84 - 202.00)  |                   |              |       |
|                | <b>b</b>  | SPD 1                                                   | Year.SitePopDensity.Guards.Lat.Lon | 51.6%      | 1.5764            | 2002                 | 285.85            | (111.24 - 913.29) | 51.33        | 22.37 |
|                |           |                                                         |                                    |            |                   | 2011                 | 139.11            | (60.50 - 454.26)  |              |       |
| SPD 2          |           | Year.SitePopDensity.Corruption.Guards                   | 43.3%                              | 1.5888     | 2002              | 299.90               | (108.62 - 664.36) | 62.11             | 41.57        |       |
|                |           |                                                         |                                    |            | 2011              | 113.63               | (54.55 - 290.61)  |                   |              |       |
| SPD 3          |           | Dist2Road.SitePopDensity.Corruption.Guards              | 43.6%                              | 1.6506     | 2002-2011         | 174.61               | (118.63 - 292.76) | -                 |              |       |
| SPD 4          |           | Year.Dist2Road.SitePopDensity.Corruption.Guards         | 44.9%                              | 1.6616     | 2002              | 298.95               | (52.64 - 661.03)  | 63.59             | 37.26        |       |
|                |           |                                                         |                                    |            | 2011              | 108.86               | (50.74 - 282.28)  |                   |              |       |
| SPD 5          |           | Dist2Road.SitePopDensity.Guards.Lat.Lon                 | 52.3%                              | 1.7652     | 2002-2011         | 205.34               | (115.29 - 442.11) | -                 |              |       |
| SPD 6          |           | Year.Dist2Road.SitePopDensity.Corruption.Guards.Lat.Lon | 45.6%                              | 1.8554     | 2002              | 283.23               | (76.23 - 797.04)  | 60.89             | 27.69        |       |
|                |           |                                                         |                                    |            | 2011              | 110.77               | (55.03 - 506.43)  |                   |              |       |
| <b>Average</b> |           |                                                         |                                    |            |                   |                      |                   | <b>61.63</b>      | <b>29.68</b> |       |
