# Supplementary material for: Devastating Decline of Forest Elephants in Central Africa
Source: PLOS journal article supplement (doi:10.1371/journal.pone.0059469), 2013-03-04
Supplement: S8 (10.1371/journal.pone.0059469.s008) [file journal.pone.0059469.s008]

Table S4. Description of spatial variables, data source, method of calculation, likely influence on elephant density, UBRE score and deviance explained for the single variable models.

| Variable Type        | Variable Name         | Description                                                                                                                | Data Source                                                                                                                                                                                                     | Method of calculating Variable value                                                                                                                  | Potential influence on elephant density                                                                                         | UBRE score | Deviance explained |
|----------------------|-----------------------|----------------------------------------------------------------------------------------------------------------------------|-----------------------------------------------------------------------------------------------------------------------------------------------------------------------------------------------------------------|-------------------------------------------------------------------------------------------------------------------------------------------------------|---------------------------------------------------------------------------------------------------------------------------------|------------|--------------------|
| Survey Site Specific | Hunter Sign           | Encounter rate of all sign associated with hunting, such as snares, shotgun cartridges, camps, machete cuts, hunter paths. | Survey datasets and reports                                                                                                                                                                                     | Number of signs per kilometre walked.                                                                                                                 | Elephant density negatively associated with increasing hunter sign encounter rate.                                              | 1.9283     | 14.9%              |
|                      | Year                  | Calendar year.                                                                                                             | Survey datasets and reports                                                                                                                                                                                     | Calendar year survey was conducted.                                                                                                                   | Elephant density negatively associated with surveys completed in recent years.                                                  | 1.8268     | 7.7%               |
|                      | Dist2Road             | Proximity to roads.                                                                                                        | World Conservation Monitoring Centre dataset and local adjustments for errors                                                                                                                                   | Average value across the survey site in projected Universal Transverse Mercator (UTM) coordinates.                                                    | Elephant density positively associated with increasing distance away from roads.                                                | 1.9713     | 7.9%               |
|                      | SitePop Density       | Number of people per square kilometre.                                                                                     | Gridded Population of the World<br><a href="http://sedac.ciesin.columbia.edu/gpw/">http://sedac.ciesin.columbia.edu/gpw/</a>                                                                                    | Average value across the survey site using the 2005 data layer for surveys completed 2002-2007 and the 2010 data layer for those completed 2008-2011. | Elephant density negatively associated with sites with a higher overall human population density.                               | 2.1513     | 25.2%              |
|                      | Human Influence Index | Aggregate score for suite of variables (see reference).                                                                    | Last of the Wild Data Version 2<br><a href="http://sedac.ciesin.columbia.edu/wildareas/downloads.jsp#infl">http://sedac.ciesin.columbia.edu/wildareas/downloads.jsp#infl</a>                                    | Average value across the survey site.                                                                                                                 | Elephant density negatively associated with increasing Human Influence Index.                                                   | 2.4976     | 14.5%              |
|                      | Official Protection   | Score reflecting degree of protection.                                                                                     | Central African Regional Program for the Environment (CARPE).                                                                                                                                                   | Ranges from 1 (National Park) to 5 (no official protection).                                                                                          | Elephant density positively associated with sites where official protection is stronger.                                        | 3.3039     | 9.4%               |
|                      | Guards                | Whether or not a site has guards.                                                                                          | Knowledge of the sites.                                                                                                                                                                                         | 0 or 1.                                                                                                                                               | Elephant density positively associated with sites where wildlife guards are employed.                                           | 2.1463     | 14.2%              |
| Country Specific     | Country               | Name of country.                                                                                                           | NA                                                                                                                                                                                                              | Unique value assigned per country.                                                                                                                    | Elephant density positively associated with more developed, less corrupt countries where conservation is higher on the agenda.  | 1.7829     | 32.0%              |
|                      | Corruption            | Degree of corruption.                                                                                                      | Transparency International's Corruption Perceptions Index 2006<br><a href="http://www.transparency.org/policy_research/surveys_indices/cpi">http://www.transparency.org/policy_research/surveys_indices/cpi</a> | Ranges from 0-10. Smaller values indicate higher levels of corruption.                                                                                | Elephant density negatively associated with a lower Corruption Perception Index (corresponding to higher levels of corruption). | 1.7742     | 31.4%              |
| Regional Proxies     | Lat                   | Latitude coordinate.                                                                                                       | NA                                                                                                                                                                                                              | Approximate centroid of each survey site.                                                                                                             | NA                                                                                                                              | 2.1553     | 9.5%               |
|                      | Lon                   | Longitude coordinate.                                                                                                      | NA                                                                                                                                                                                                              | Approximate centroid of each survey site.                                                                                                             | NA                                                                                                                              | 1.5754     | 31.0%              |
