# Supplementary material for: Devastating Decline of Forest Elephants in Central Africa
Source: PLOS journal article supplement (doi:10.1371/journal.pone.0059469), 2013-03-04
Supplement: S10 (10.1371/journal.pone.0059469.s010) [file journal.pone.0059469.s010]

Table S6. Estimated forest cover by country as defined by Iremonger et al. (1997) [96].

| <b>Country</b>               | <b>Forest cover (km<sup>2</sup>)</b> | <b>Percent of total forest cover</b> |
|------------------------------|--------------------------------------|--------------------------------------|
| Cameroon                     | 191,536                              | 8.67%                                |
| Central African Republic     | 67,394                               | 3.05%                                |
| Democratic Republic of Congo | 1,383,517                            | 62.64%                               |
| Republic of Congo            | 286,454                              | 12.97%                               |
| Gabon                        | 279,813                              | 12.67%                               |
